# Supplementary material
Source: PubMed Central journal article supplement (PMC4833017)

## Supplemental Table 1: Eterna100 Benchmark

This table provides details of the Eterna100 benchmark, with puzzle number, name, Eterna ID, author, and secondary structure string. The solvers column indicates how many participants of the study were able to solve the problem under specific user-defined constraints, as of July 22, 2015. As the six tested algorithms ignored these constraints, the number of solvers might not be an accurate measure of the overall problem difficulty. The Teslagon puzzle only has 1 solver, as no participants other than the puzzle's original creator have yet found a solution. Additionally, sample solutions can be found in Dataset S2.

| # | Puzzle Name                                               | Eterna ID | Author  | Secondary Structure                                                                                                                                                                                         | Solvers |
|---|-----------------------------------------------------------|-----------|---------|-------------------------------------------------------------------------------------------------------------------------------------------------------------------------------------------------------------|---------|
| 1 | Simple Hairpin                                            | 20111     | Sneh    | (((.....)))                                                                                                                                                                                                 | 59723   |
| 2 | Arabidopsis<br>Thaliana 6 RNA -<br>Difficulty Level 0     | 215430    | Sneh    | (((.....)))<br>..))))))                                                                                                                                                                                     | 22230   |
| 3 | Prion<br>Pseudoknot -<br>Difficulty Level 0               | 15819     | Sneh    | (((.....))).....                                                                                                                                                                                            | 15727   |
| 4 | Human<br>Integrated<br>Adenovirus -<br>Difficulty Level 0 | 15886     | Sneh    | (((.....))).....(((.....))).....<br>.....(((.....))).....(((.....))).....<br>.....(((.....))).....(((.....))).....                                                                                          | 13427   |
| 5 | The<br>Gammaretrovirus<br>Signal -<br>Difficulty Level 0  | 15847     | Sneh    | ..(.....)).....(((.....))).....(((.....))).....                                                                                                                                                             | 10304   |
| 6 | Saccharomyces<br>Cerevisiae -<br>Difficulty Level 0       | 17811     | Sneh    | (((.....))).....(((.....))).....(((.....))).....<br>.....(((.....))).....(((.....))).....(((.....))).....<br>.....(((.....))).....(((.....))).....(((.....))).....<br>.....(((.....))).....(((.....)))..... | 3252    |
| 7 | Fractal 2                                                 | 13687     | pkinney | .....(((.....))).....(((.....))).....(((.....))).....<br>(.....)).....(((.....))).....(((.....))).....<br>(.....)).....(((.....))).....(((.....))).....                                                     | 365     |





|           |                                                         |             |                  |                                                                                              |    |
|-----------|---------------------------------------------------------|-------------|------------------|----------------------------------------------------------------------------------------------|----|
| <b>40</b> | Tripod5                                                 | 903842      | janderso<br>nlee | ..(((((((.....))))((((.....))))))..                                                          | 84 |
| <b>41</b> | Shortie 6                                               | 997391      | Eli Fisker       | ((.....)-(.....)-(.....)-(.....)-(.....))                                                    | 80 |
| <b>42</b> | Runner                                                  | 888104      | Yoshi789         | .....(((((((.....((((.....))))))..(((.....))))))..(((.....))))..(((.....))))..(((.....)))).. | 78 |
| <b>43</b> | Recoil                                                  | 969361      | largevee         | .....(((((((.....((((.....))))))..(((.....))))))..(((.....))))..(((.....))))..               | 78 |
| <b>44</b> | [CloudBeta] An<br>Arm and a Leg<br>1.0                  | 232025<br>9 | kcabral28        | .....(((((((.....))))((((.....))))))..(((.....))))..(((.....))))..                           | 78 |
| <b>45</b> | [CloudBeta] 5<br>Adjacent Stack<br>Multi-Branch<br>Loop | 232287<br>9 | Brouard          | (((((((((.....))))((((.....))))))((((.....))))((((.....))))))..                              | 78 |
| <b>46</b> | Triple Y                                                | 481598      | Quasispe<br>cies | .....(((((((.....))))((((.....))))))((((.....))))((((.....))))..                             | 76 |
| <b>47</b> | Misfolded<br>Aptamer                                    | 683941      | starryjess       | (((((.....((((.....))))((.....)).....)).....))                                               | 72 |
| <b>48</b> | Flower power                                            | 188495<br>9 | ariel19_8        | .....(((((((.....))))((((.....))))..(((.....))))..(((.....))))..                             | 72 |
| <b>49</b> | Kudzu                                                   | 458872      | Quasispe<br>cies | .....(((((((.....((((.....))))))((((.....))))..(((.....))))..(((.....))))..                  | 59 |
| <b>50</b> | 1,2,3and4bulges                                         | 737448      | Edward<br>Lane   | .....(((((((.....))))..(((.....))))..(((.....))))..(((.....))))..                            | 58 |
| <b>51</b> | medallion                                               | 139897<br>4 | mspano           | (((((.....((((.....))))..(((.....))))..(((.....))))..(((.....))))..(((.....))))..            | 55 |
| <b>52</b> | [RNA]<br>Repetitious<br>Sequences 8/10                  | 314414<br>4 | paramodi<br>c    | ..(((.....((((.....))))..(((.....))))..(((.....))))..                                        | 52 |
| <b>53</b> | Documenting                                             | 319498      | paramodi         | .....(((((((.....))))..(((.....))))..(((.....))))..                                          | 51 |



|      |                            |                |                 |    |
|------|----------------------------|----------------|-----------------|----|
| Bond |                            |                |                 |    |
| 68   | Taraxacum officinale       | 188712<br>1 9  | ariel19_8       | 30 |
| 69   | Headless Bug on Windshield | 461805         | Quasispecies    | 29 |
| 70   | Pokeball                   | 241850<br>7 45 | rnjensen        | 29 |
| 71   | Variation of a crop circle | 972844         | jboanmit        | 28 |
| 72   | Loop next to a Multiloop   | 472262         | Brouard         | 27 |
| 73   | Snowflake 4                | 415914         | Ding            | 26 |
| 74   | Mat - Cuboid               | 450940         | mat747          | 26 |
| 75   | Misfolded Aptamer 6        | 708346         | starryjess      | 24 |
| 76   | Snowflake 3                | 415093         | Ding            | 23 |
| 77   | Hard Y and a bit more      | 443518         | Joshua Weitzman | 23 |
| 78   | Mat - Lot 2-2 B            | 451142         | mat747          | 23 |







**Supplemental Figure 1:** Secondary structures for each of the design challenges in the EteRNA100 benchmark are shown below, where orange and blue represent unpaired and paired nucleotides, respectively. Each design challenge's id is displayed at the top left for reference, along with part of the design challenge's name. The 5' end is always directly to the left of the 3' end.

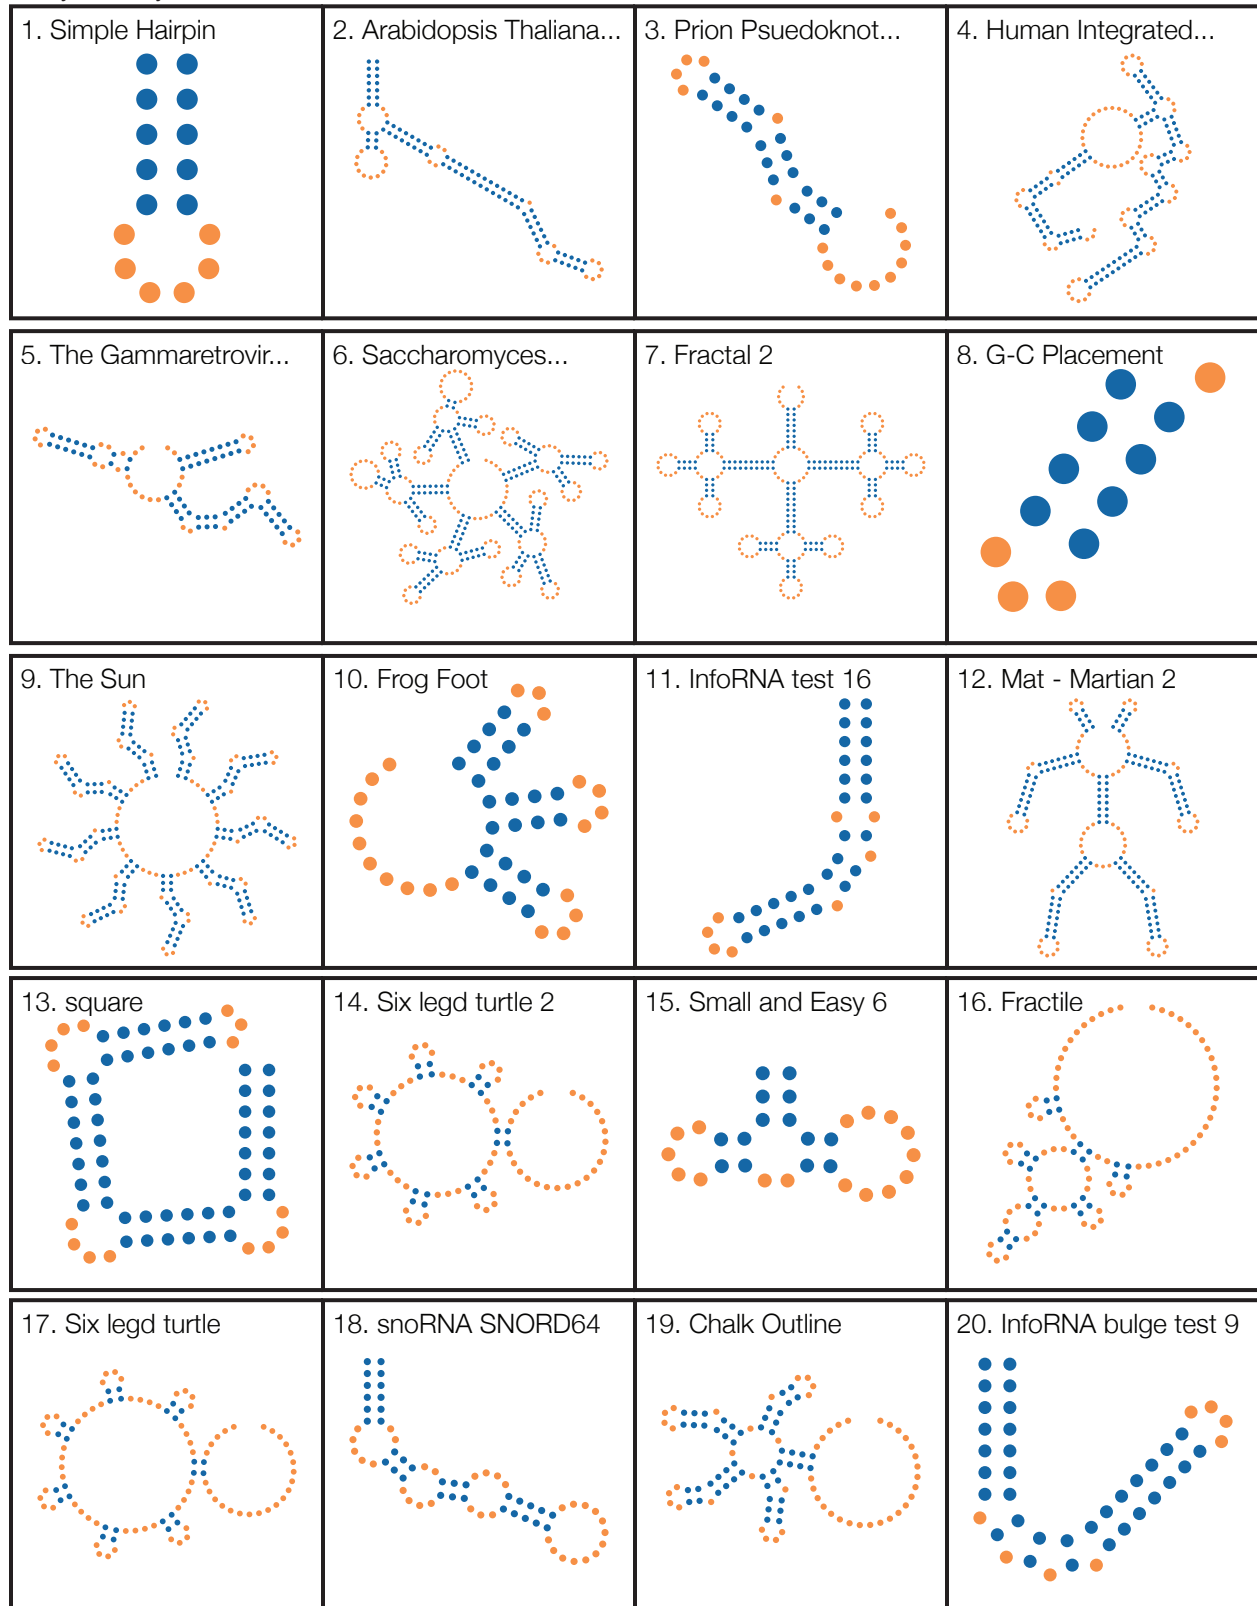

21. Tilted Russian Cross

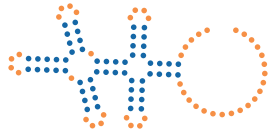

22. This is ACTUALLY...

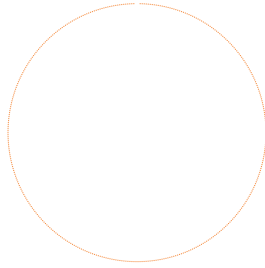

23. Shortie 4

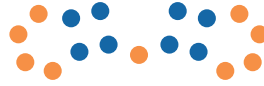

24. Shape Test

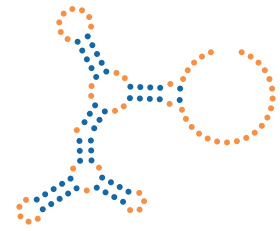

25. The Ministry

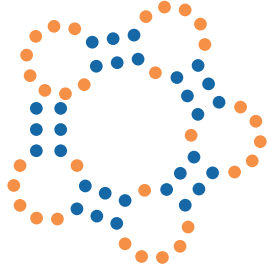

26. stickshift

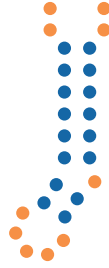

27. U

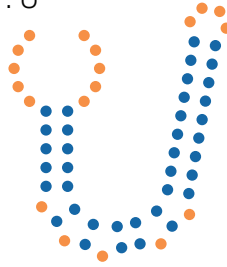

28. Still Life...

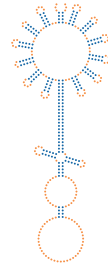

29. Quasispecies 2-2...

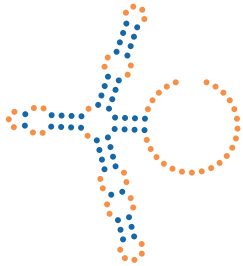

30. Corner bulge training

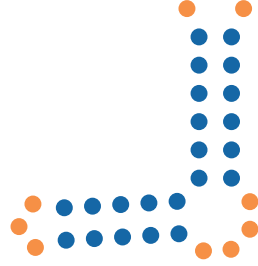

31. Spiral

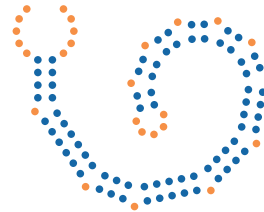

32. InfoRNA bulge test

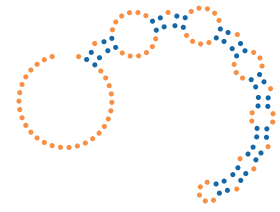

33. Worm 1

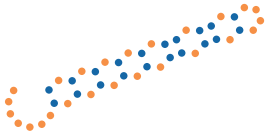

34. just down to 1 bulge

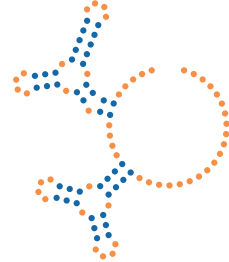

35. Iron Cross

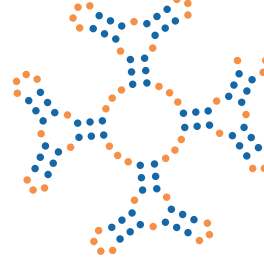

36. loops and stems

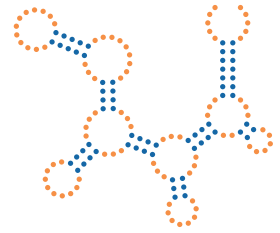

37. Water Strider

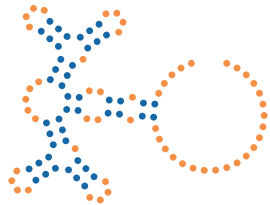

38. The Turtle(s) Move(s)

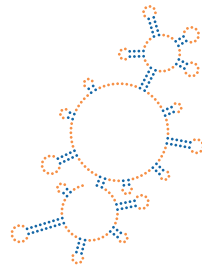

39. Adenine

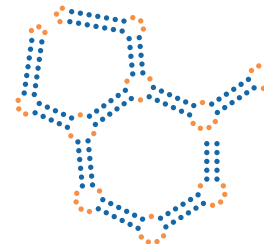

40. Tripod5

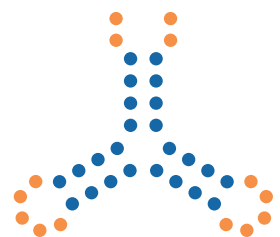

41. Shortie 6

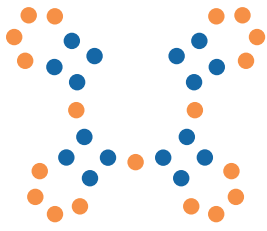

42. Runner

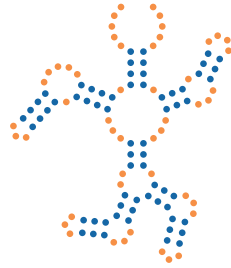

43. Recoil

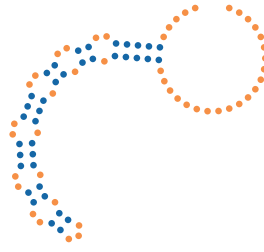

44. [CloudBeta] An Arm...

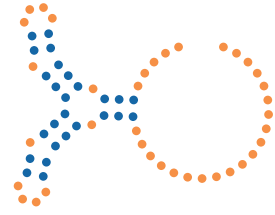

45. [CloudBeta] 5 Adj...

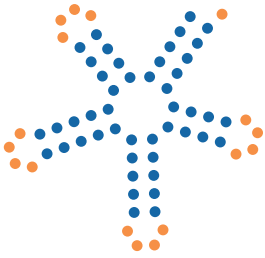

46. Triple Y

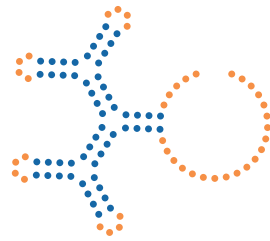

47. Misfolded Aptamer

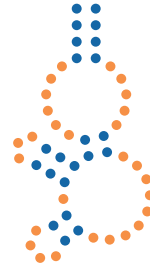

48. Flower power

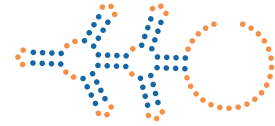

49. Kudzu

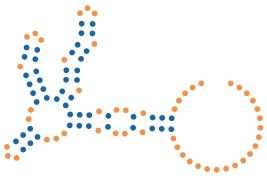

50. 1,2,3and4bulges

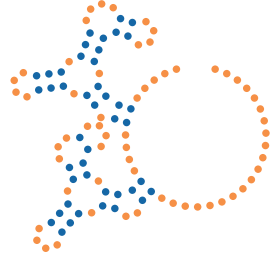

51. medallion

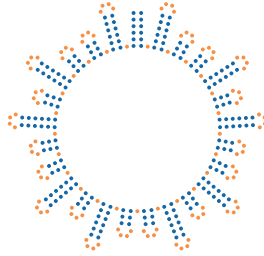

52. [RNA] Repetitious...

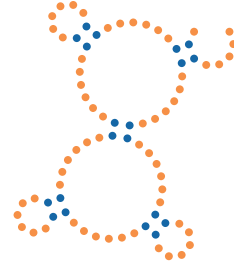

53. Documenting repe...

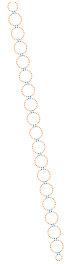

54. 7 multiloop

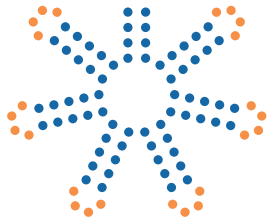

55. Kyurem 7

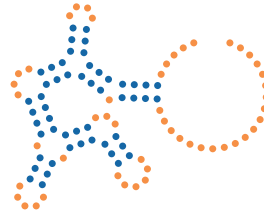

56. JF1

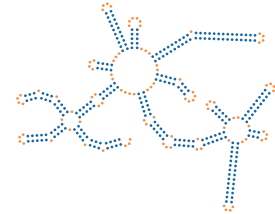

57. multilooping fun

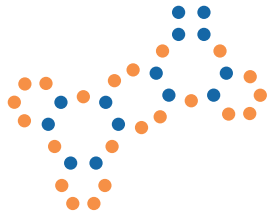

58. Multiloop...

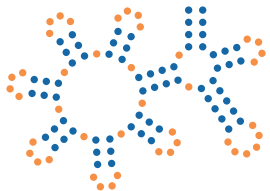

59. hard Y

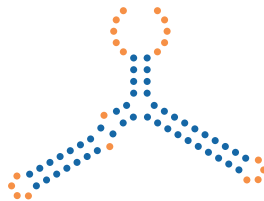

60. Mat - Elements...

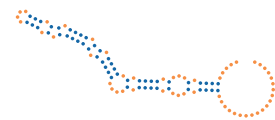

61. Chicken feet

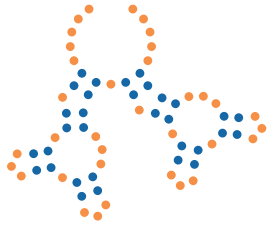

62. Bug 18

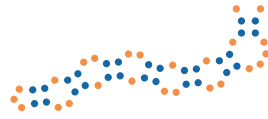

63. Fractal star x5

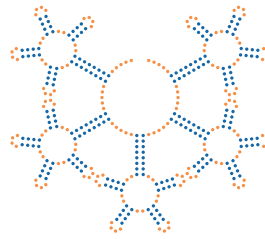

64. Crop circle 2

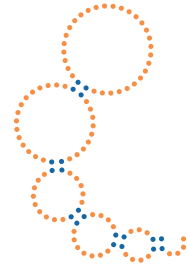

65. Branching Loop

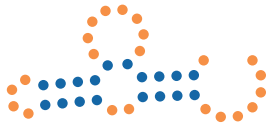

66. Bug 38

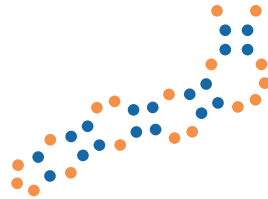

67. Simple Single Bond

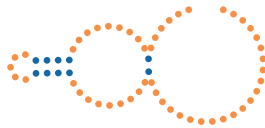

68. Taraxacum...

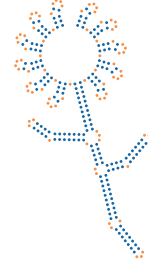

69. Headless Bug on...

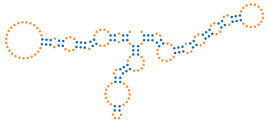

70. Pokeball

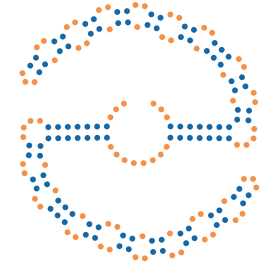

71. Variation of a crop...

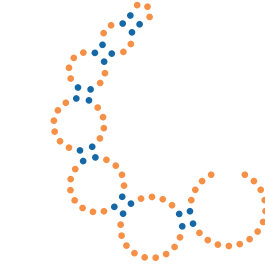

72. Loop next to a...

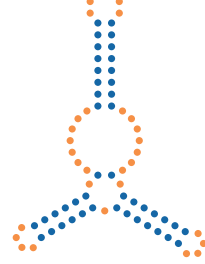

73. Snowflake 4

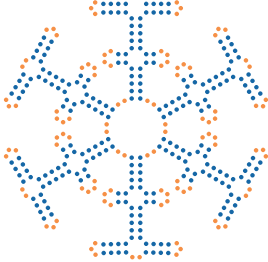

74. Mat - Cuboid

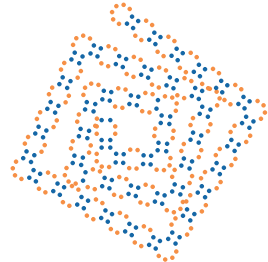

75. Misfolded Aptamer 6

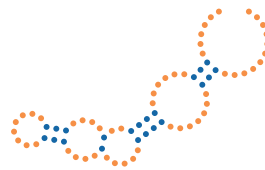

76. Snowflake 3

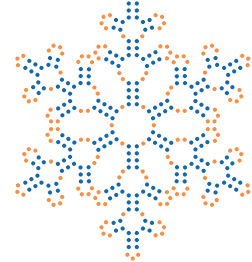

77. Hard Y and a bit more

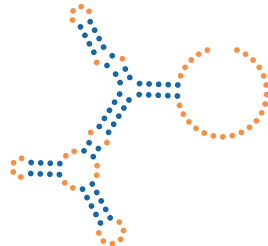

78. Mat - Lot 2-2 B

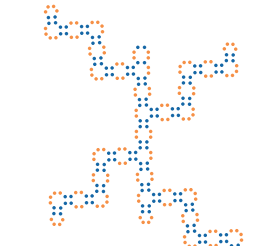

79. Shapes and Energy

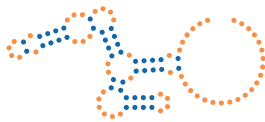

80. Spiral of 5's

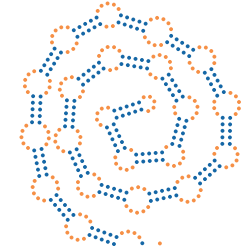

81. Campfire

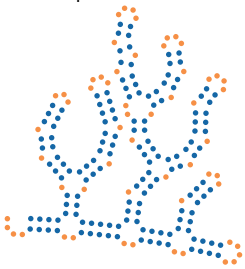

82. Anemone

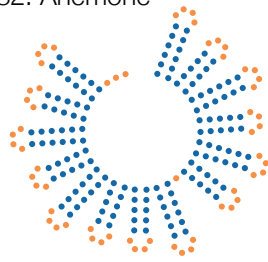

83. Fractal 3

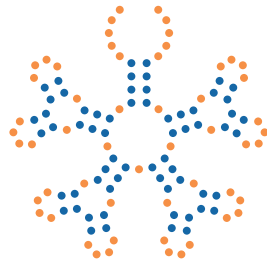

84. Kyurem 5

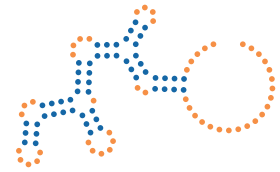

85. Snowflake Necklace...

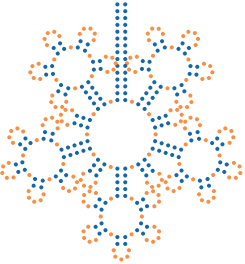

86. Methaqualone...

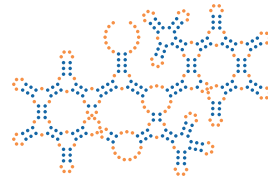

87. Cat's Toy 2

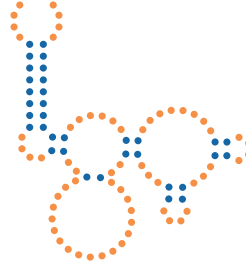

88. Zigzag Semicircle

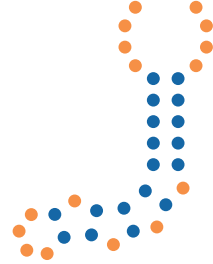

89. Short String 4

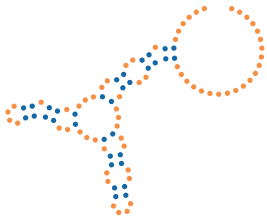

90. Gladius

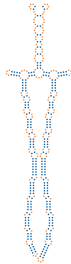

91. Thunderbolt

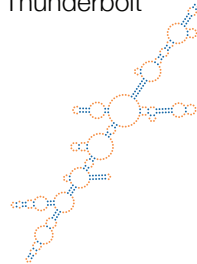

92. Mutated chicken...

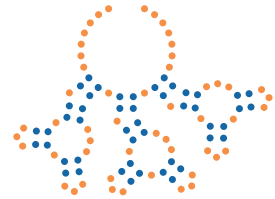

93. Chicken Tracks

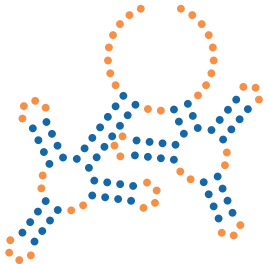

94. Looking Back Again

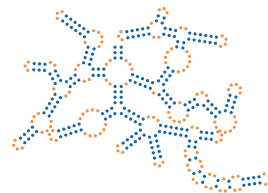

95. Multilooping 6

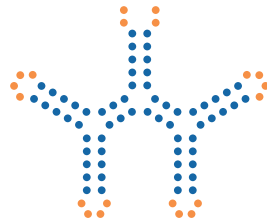

96. Cesspool

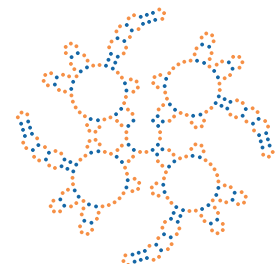

97. Hoglafractal

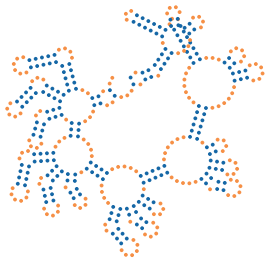

98. Bullseye

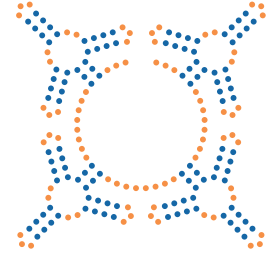

99. Shooting Star

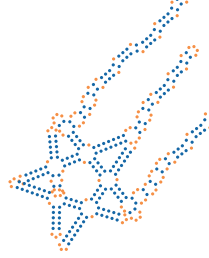

100. Teslagon

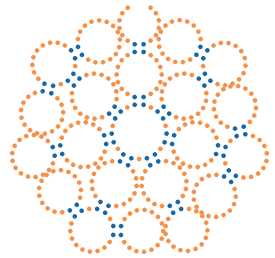

Supplement: NIHMS747287-supplement-1.pdf [file NIHMS747287-supplement-1.pdf]
